# Supplementary material for: Assessment of Heme and Non-Heme Iron Intake and Its Dietary Sources among Adults in Armenia
Source: MDPI journal article supplement (doi:10.3390/nu15071643), 2023-03-28
Supplement: s1 [file s1]

**Table S1.** Investigated food products.

| Food Groups                    | Composite Food Products (“As Consumed” Preparation)                                           | N of Individual Samples (Sub-Samples) |
|--------------------------------|-----------------------------------------------------------------------------------------------|---------------------------------------|
| Bread and flour-based products | Bread                                                                                         | 16                                    |
|                                | Lavash                                                                                        | 16                                    |
|                                | Rice (boiled in tap water with salt and spices, as well as prepared as a pilaf)               | 8                                     |
|                                | Buckwheat (boiled in tap water with salt, then vegetable oil was added)                       | 8                                     |
|                                | Emmer and groat (boiled in tap water with salt, then vegetable oil was added)                 | 8                                     |
|                                | Macaroni and vermicelli (boiled in tap water with salt, then vegetable oil was added)         | 8                                     |
|                                | Waffles and cookies                                                                           | 10                                    |
| Milk and milk products         | Pasteurized milk                                                                              | 8                                     |
|                                | Yogurt                                                                                        | 8                                     |
|                                | Sour cream                                                                                    | 8                                     |
|                                | Matsun                                                                                        | 8                                     |
|                                | Cheese                                                                                        | 8                                     |
|                                | Curd/cottage cheese                                                                           | 8                                     |
| Meat and meat products         | Beef and veal (boiled, pan-fried, or prepared as a barbeque)                                  | 8                                     |
|                                | Pork (grilled or prepared as a barbeque)                                                      | 8                                     |
|                                | Chicken meat (boiled, pan-fried, grilled, or prepared as a barbeque)                          | 8                                     |
|                                | Sausage products                                                                              | 8                                     |
|                                | Pelmeni and khinkali                                                                          | 8                                     |
| Fish                           | Fish meat (boiled or pan-fried)                                                               | 8                                     |
| Egg                            | Chicken egg (boiled or prepared as an omelet)                                                 | 8                                     |
| Fat and oil products           | Butter, margarine, and vegetable oils                                                         | 10                                    |
| Fruits                         | Fruits                                                                                        | 14                                    |
| Vegetables                     | Tomato, pepper, eggplant, zucchini, and green bean (grilled/fried in vegetable oil or smoked) | 8                                     |
| Watermelon and melon           | Watermelon and melon (washed and pilled)                                                      | 8                                     |
| Tomato                         | Fresh tomatoes                                                                                | 8                                     |
| Cucumber                       | Cucumber (washed and pilled)                                                                  | 8                                     |
| Potato                         | Potatoes (boiled, or fried in vegetable oil)                                                  | 8                                     |
| Coffee                         | Black coffee (prepared with tap water, without sugar)                                         | 10                                    |
| Water                          | Tap water                                                                                     | 12                                    |

**Note [1]:** <sup>1</sup> Lavash is a thin flatbread, commonly baked by women in countries across the Caucasus and Middle East.

<sup>2</sup> Emmer and groat are used in Armenia to make traditional pilav (acharov plav, harisa) and soup (spas).

<sup>3</sup> Matsun is a fermented milk product (prepared from buffalo, goat, or cow milk, or their combinations) similar to yogurt. It has high consumption in West Asia, especially in Armenia.

<sup>4</sup> Pelmeni is a meat dumpling, common in the cuisine of Russia and post-Soviet countries. Khinkali is an herb- and meat-filled dumpling, commonly made in Georgia and other Caucasian countries, including Armenia.

## Reference

- Pipoyan, D.; Stepanyan, S.; Beglaryan, M.; Mantovani, A. Risk Characterization of the Armenian Population to Nickel: Application of Deterministic and Probabilistic Approaches to a Total Diet Study in Yerevan City. *Biol. Trace Elem. Res.* **2022**, *ahead of print*. <https://doi.org/10.1007/s12011-022-03371-8>.
